# Supplementary material for: Role of a phenothiazine/phenoxazine donor in solid ionic conductors for efficient solid state dye sensitized solar cells
Source: Royal Society of Chemistry journal article supplement (doi:10.1039/c6ta09777d), 2017-01-01
Supplement: c6ta09777d1.pdf [file c6ta09777d1.pdf]

# Role of Phenothiazine/Phenoxazine Donor in Solid Ionic Conductors for Efficient Solid State Dye Sensitized Solar Cells

Jayraj V. Vaghasiya,<sup>a</sup> Keval K. Sonigara,<sup>a</sup> Jyoti Prasad,<sup>a</sup> Thomas Beuvier,<sup>b</sup> Alain Gibaud,<sup>b</sup> Saurabh S. Soni<sup>a,\*</sup>

<sup>a</sup>Department of Chemistry, Sardar Patel University, Vallabh Vidyanagar – 388 120, Gujarat, INDIA

<sup>b</sup>IMMM, Universite du Maine, Le Mans 72000, FRANCE

## Electronic supplementary information

### Contents

|                                                                                                            |                  |
|------------------------------------------------------------------------------------------------------------|------------------|
| (a) XRD pattern, (b) SEM image of cross section and (c) SEM image top view for TiO <sub>2</sub> Photoanode | <b>Fig. S1</b>   |
| <sup>1</sup> H, <sup>13</sup> C NMR and MS of SJE 1                                                        | <b>Fig. S2</b>   |
| <sup>1</sup> H, <sup>13</sup> C NMR and MS of SJE 2                                                        | <b>Fig. S3</b>   |
| <sup>1</sup> H, <sup>13</sup> C NMR and MS of SJE 3                                                        | <b>Fig. S4</b>   |
| <sup>1</sup> H, <sup>13</sup> C NMR and MS of SJE 4                                                        | <b>Fig. S5</b>   |
| <sup>1</sup> H and <sup>13</sup> C NMR of SJE 2 (Intermediate)                                             | <b>Fig. S6</b>   |
| <sup>1</sup> H and <sup>13</sup> C NMR of SJE 4 (Intermediate)                                             | <b>Fig. S7</b>   |
| EIS spectra of SJE 1- 4                                                                                    | <b>Fig. S8</b>   |
| Raman spectra of SJE 1- 4                                                                                  | <b>Fig. S9</b>   |
| <i>J-V</i> curve of hole only devices fabricated for determination of hole mobility                        | <b>Fig. S10</b>  |
| <i>J-V</i> curve of BIM1 electrolyte                                                                       | <b>Fig. S11</b>  |
| <i>J-V</i> curve for ss-DSSC with 60μm spacer for SJE 2 and SJE 4                                          | <b>Fig. S12</b>  |
| UV-Vis spectra of pure SK 1 sensitizer and SJE 1-4                                                         | <b>Fig. S13</b>  |
| UV-Vis and fluorescence spectra of SK 1 sensitizer and SJE 1-4.                                            | <b>Fig. S14</b>  |
| UV-Visible photostability study of SJE 1-4                                                                 | <b>Fig. S15</b>  |
| Computational (DFT) calculation SJE 2 and 4 intermediates                                                  | <b>Table. S1</b> |

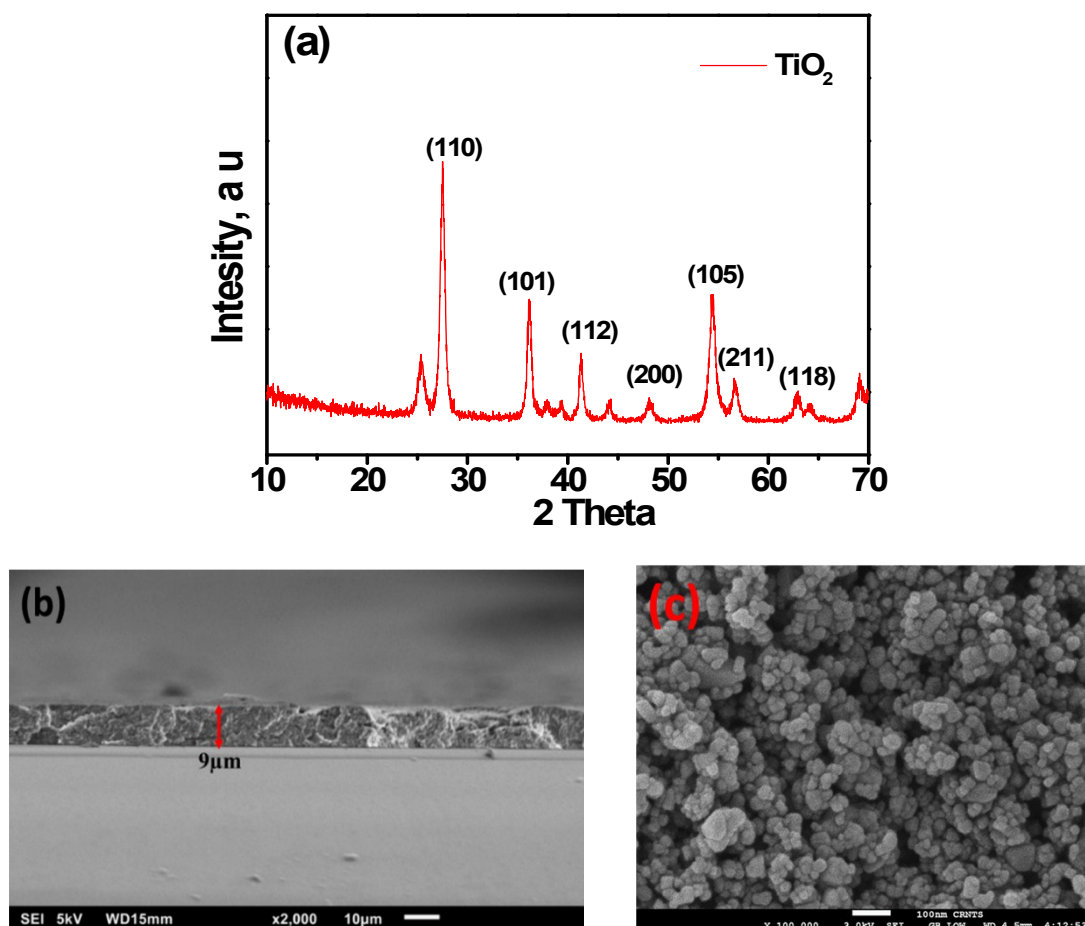

**Fig. S1.** (a) XRD pattern, (b) SEM image of cross section and (c) SEM image top view for  $\text{TiO}_2$  Photoanode

We have used anatase nanoporous  $\text{TiO}_2$  particles. Structural characterizations of  $\text{TiO}_2$  particles were carried out by using XRD. Above **Fig. S1(a)** shows the X-Ray diffraction pattern of the  $\text{TiO}_2$  nanoparticles showing the presence of pure crystalline anatase phase along with sign of little rutile domain. The peaks in the diffraction pattern can be attributed to the (110), (101), (112), (200), (105), (211) and (118) planes respectively.

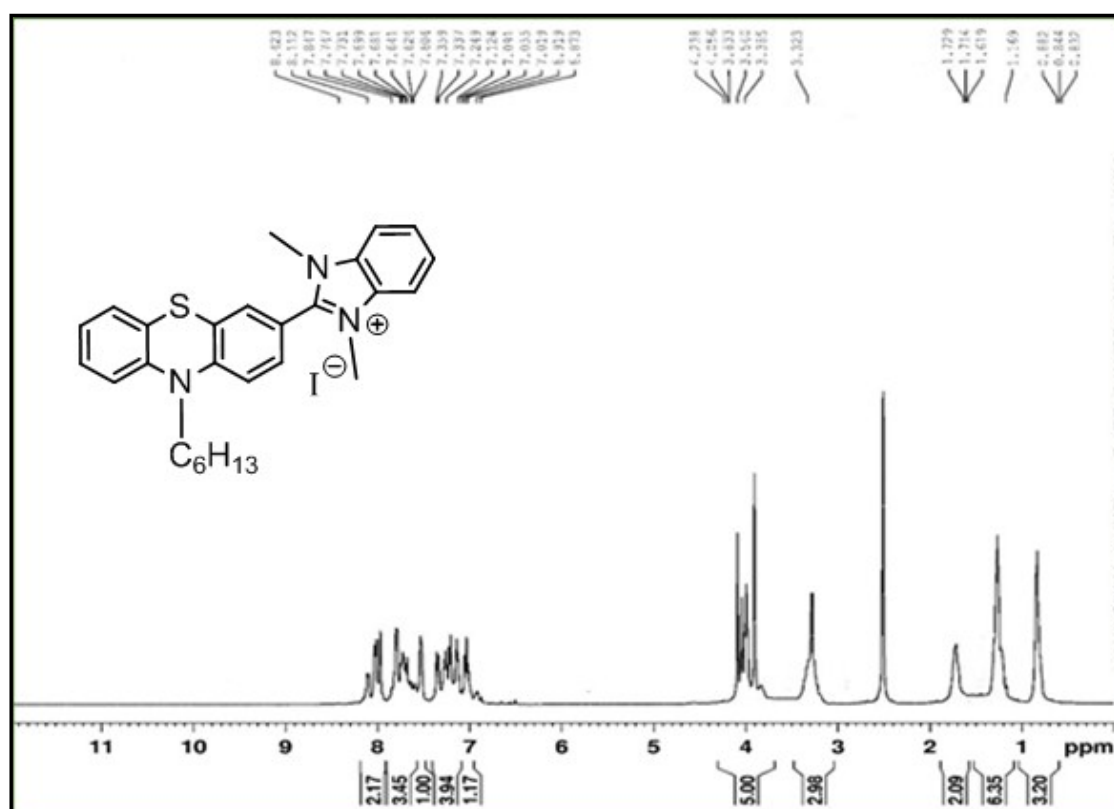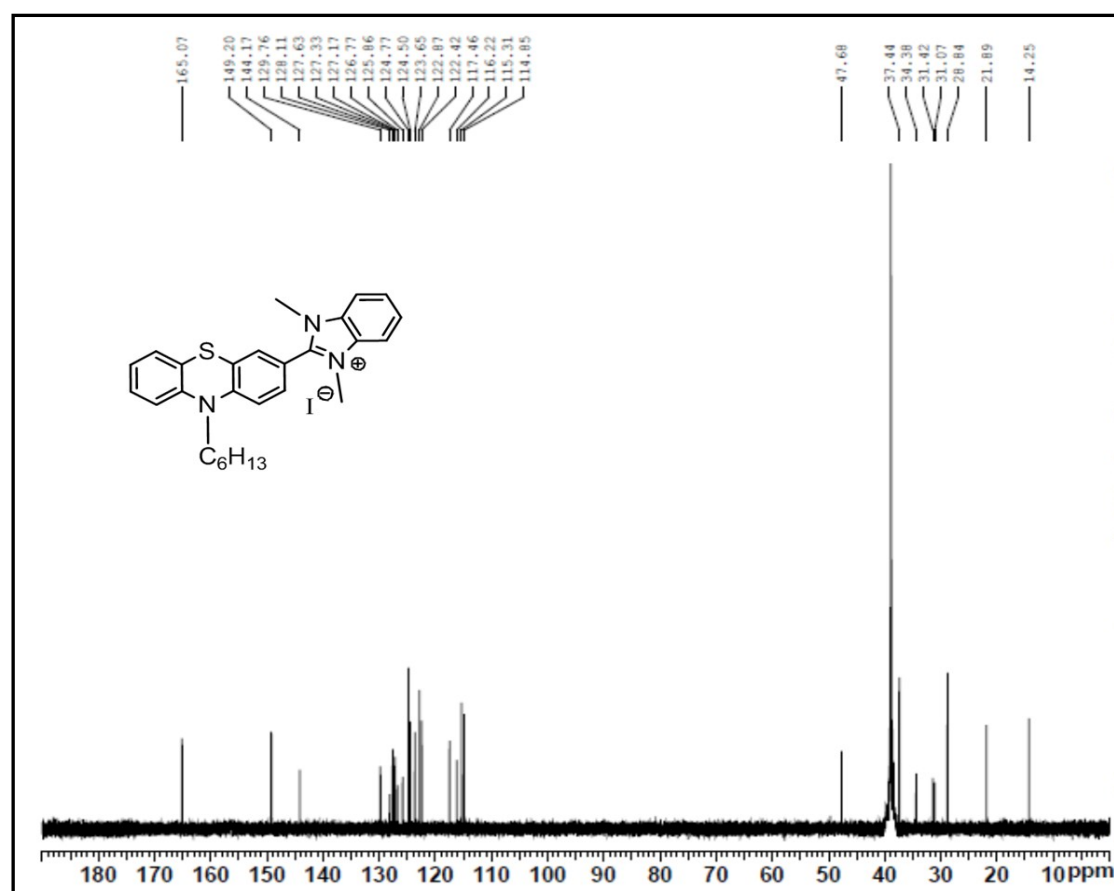

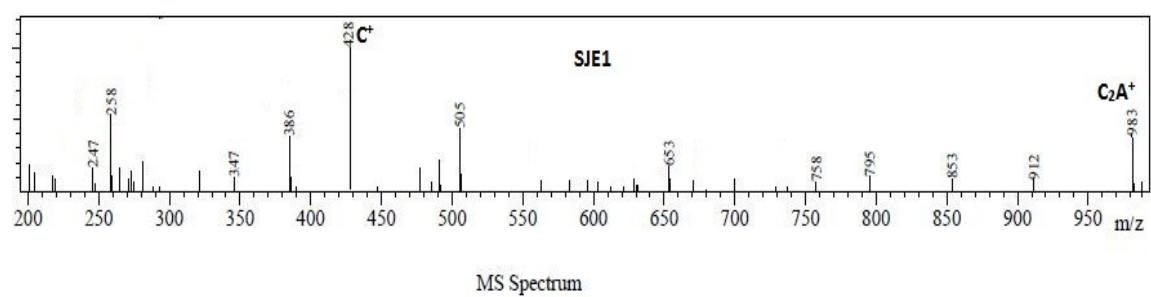

**Fig. S2.**  $^1H$ -NMR and  $^{13}C$ -NMR and MS spectra of SJE 1

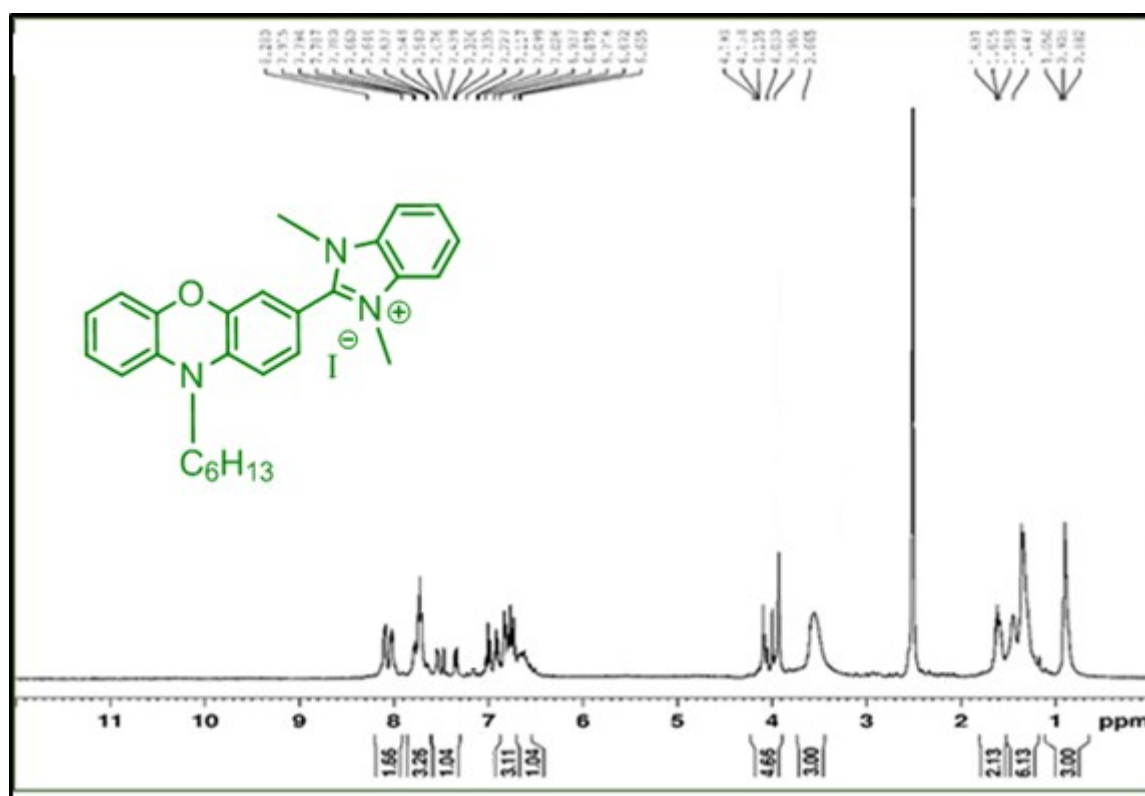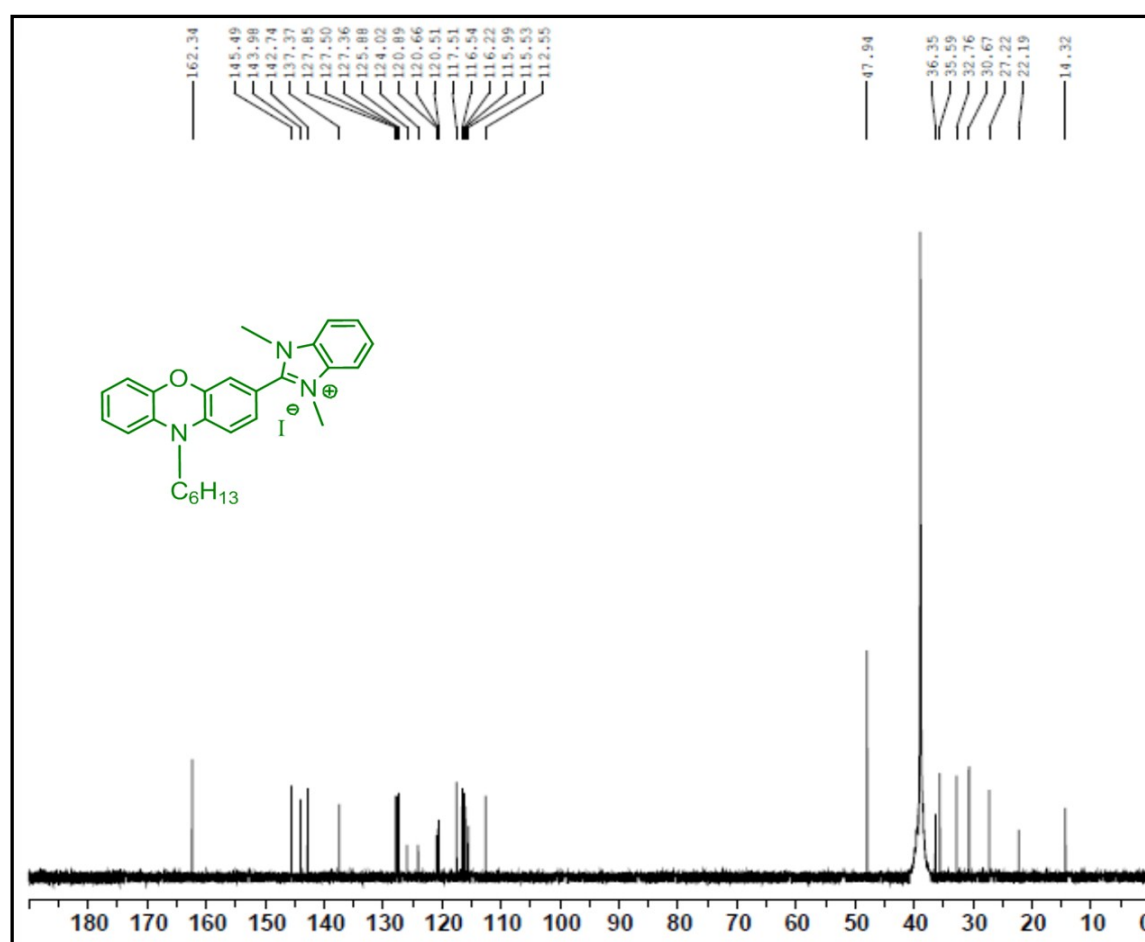

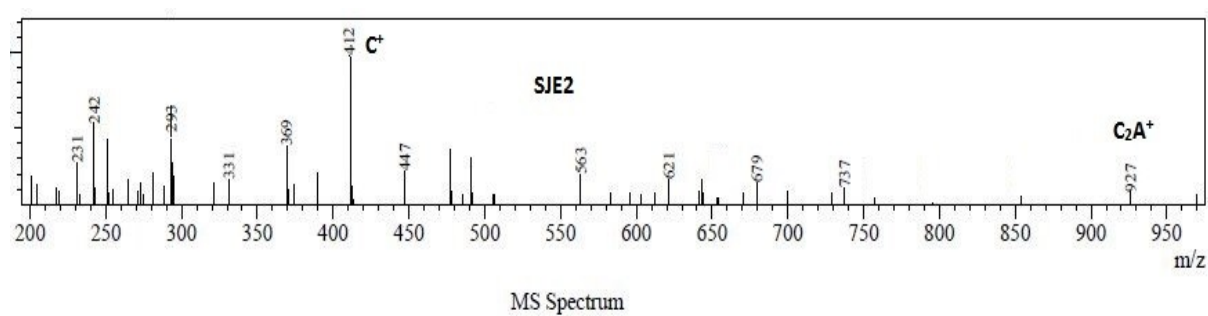

**Fig. S3.**  $^1H$ -NMR and  $^{13}C$ -NMR and MS spectra of SJE 2

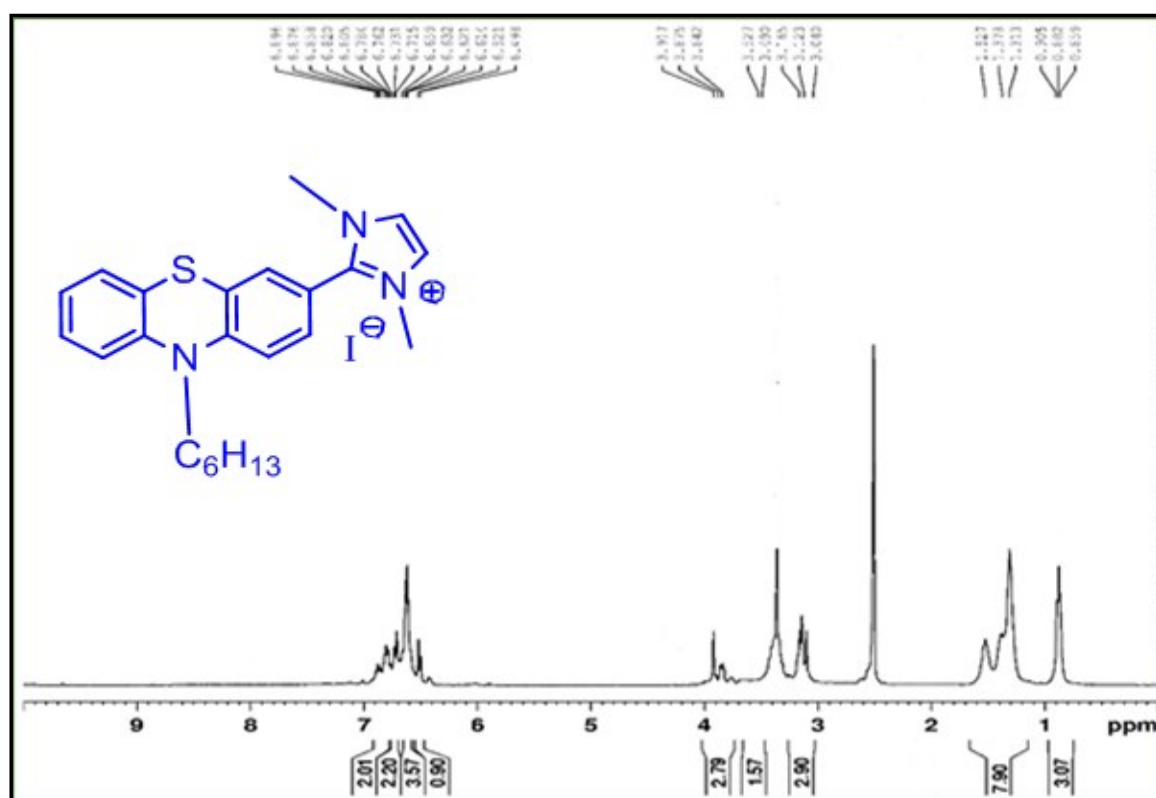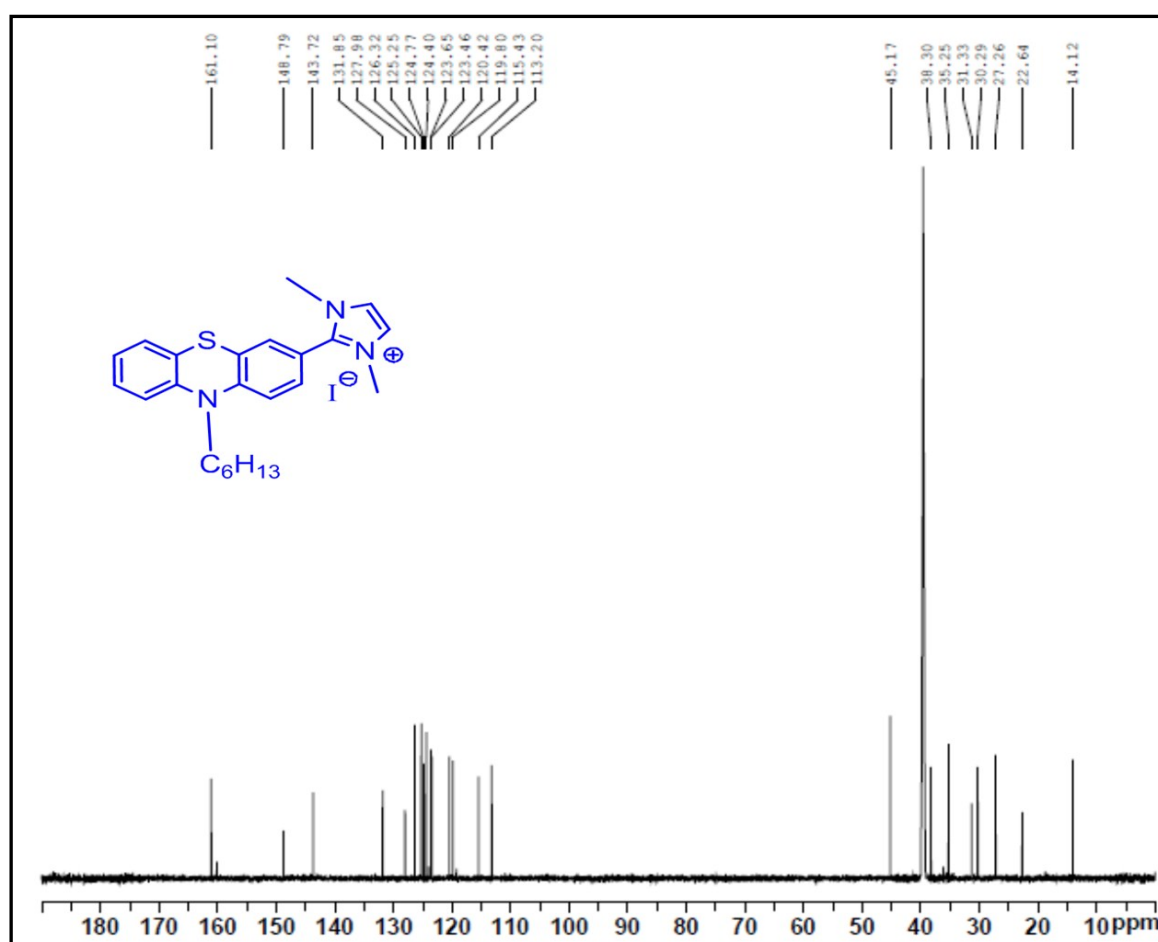

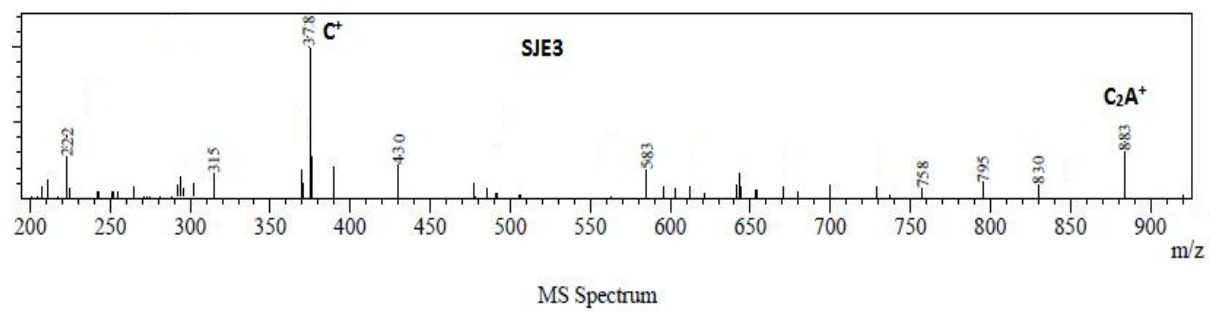

**Fig. S4.**  $^1H$ -NMR and  $^{13}C$ -NMR and MS spectra of SJE 3



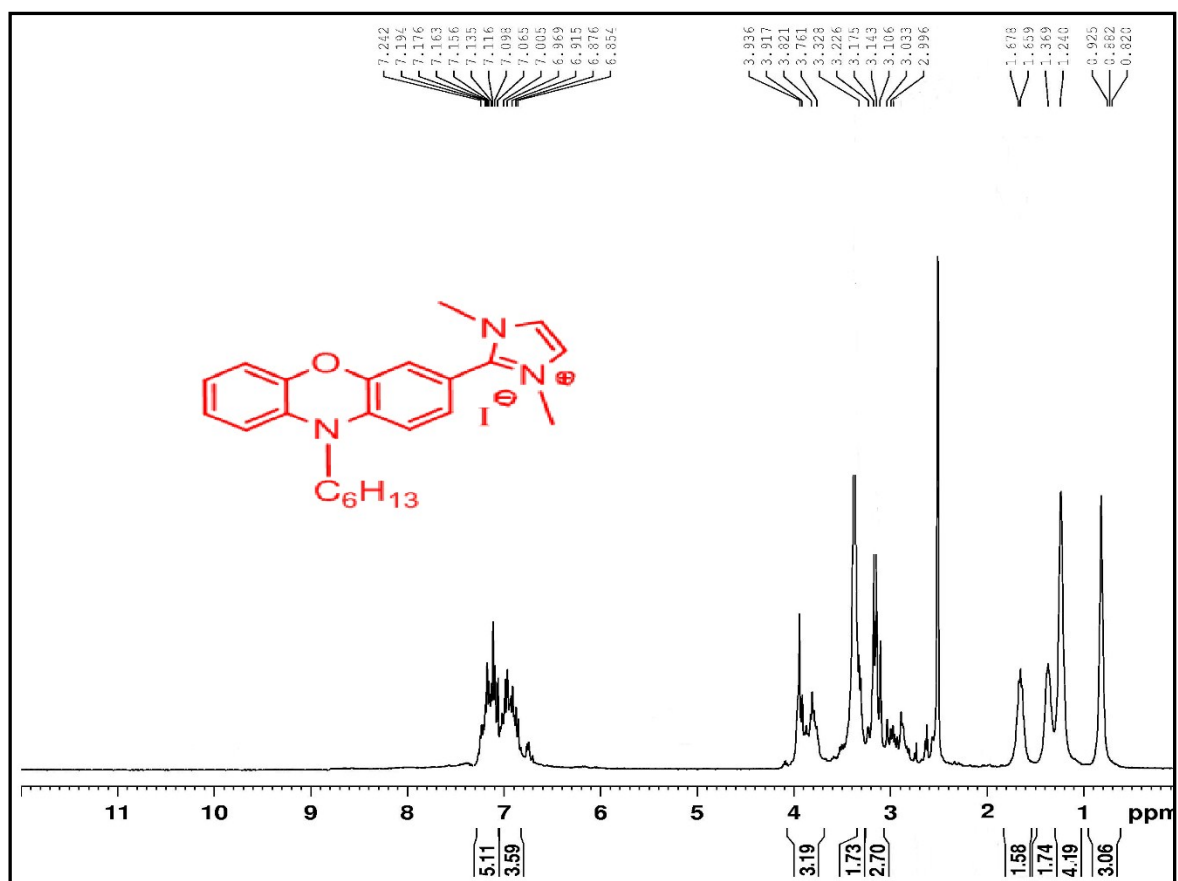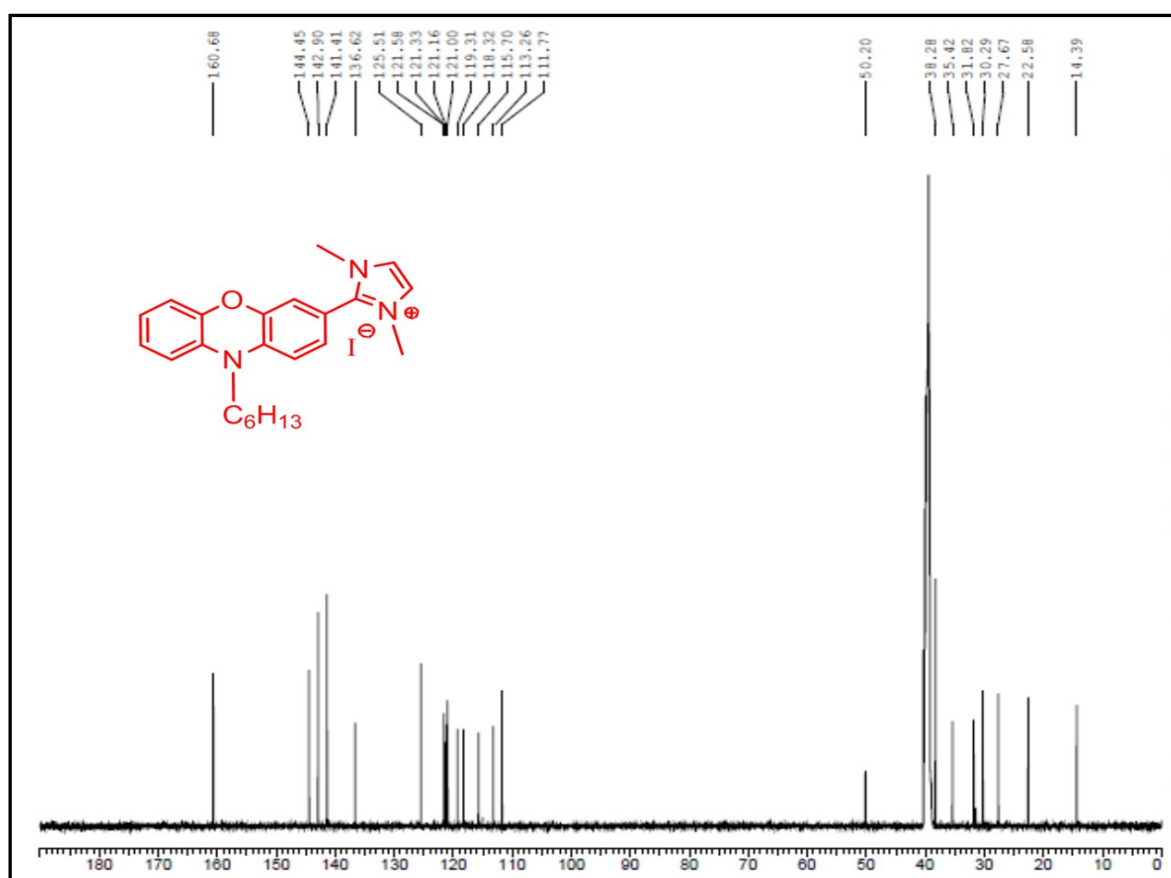

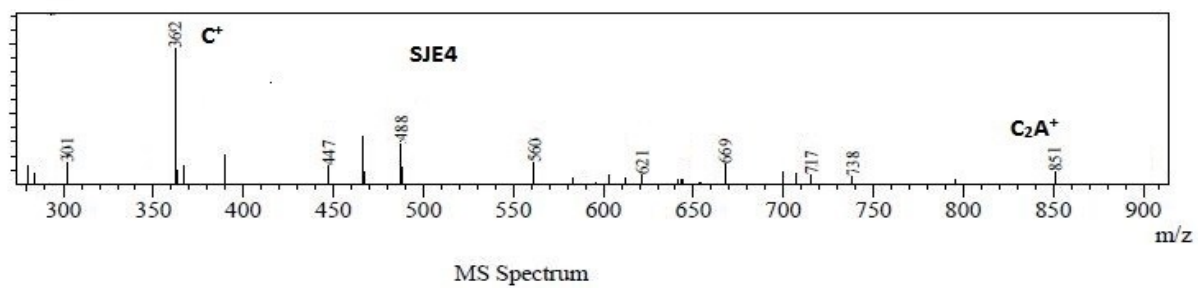

**Fig. S5.**  $^1H$ -NMR and  $^{13}C$ -NMR and MS spectra of SJE 4

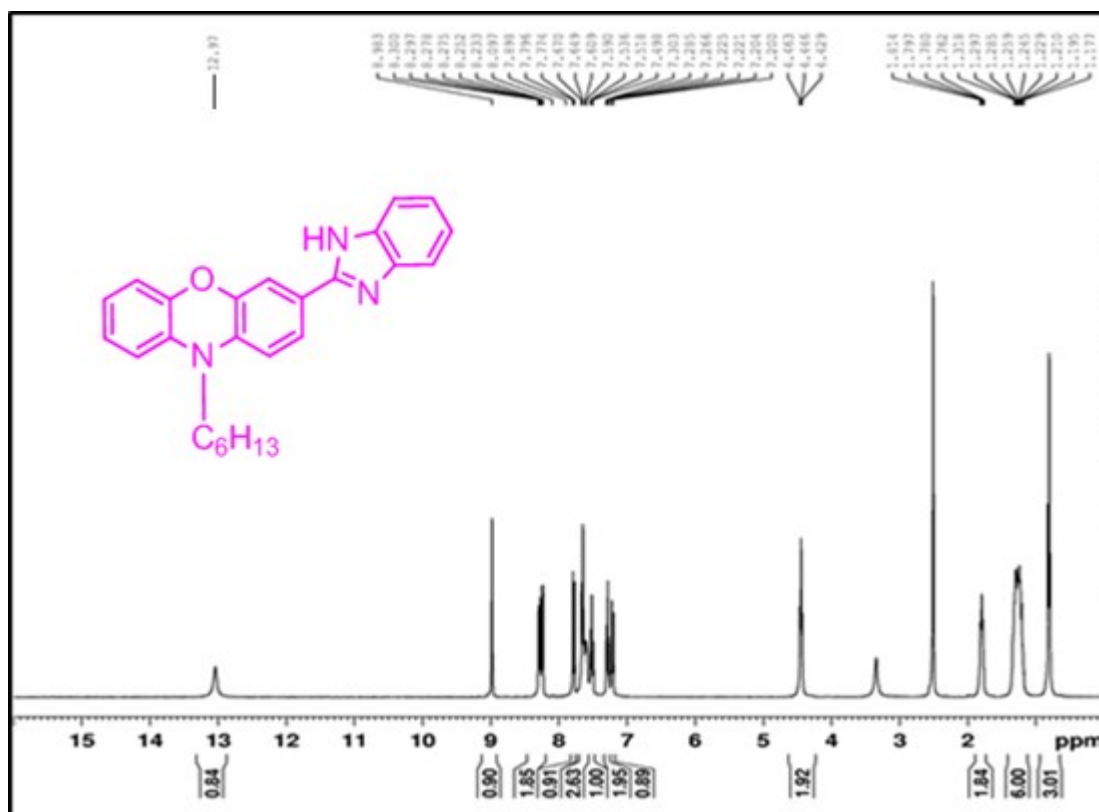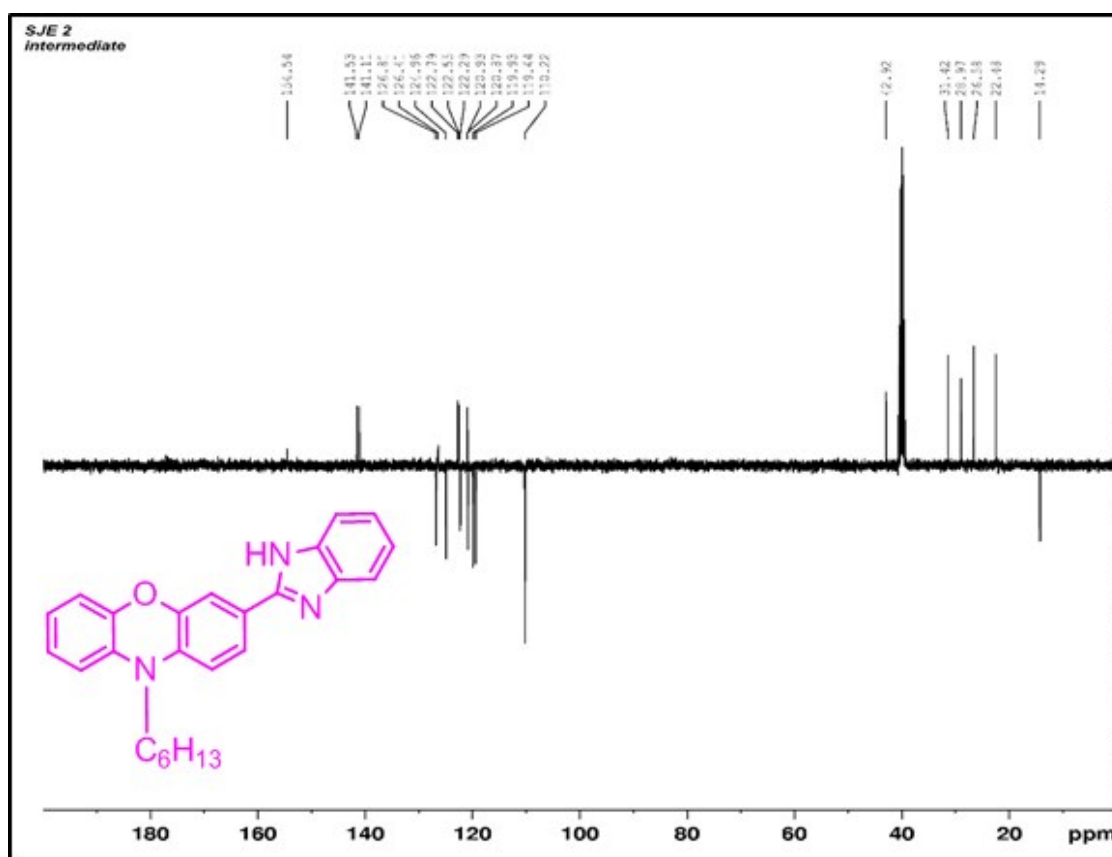

**Fig. S6.** <sup>1</sup>H-NMR and <sup>13</sup>C-NMR and MS spectra of SJE 2 intermediate

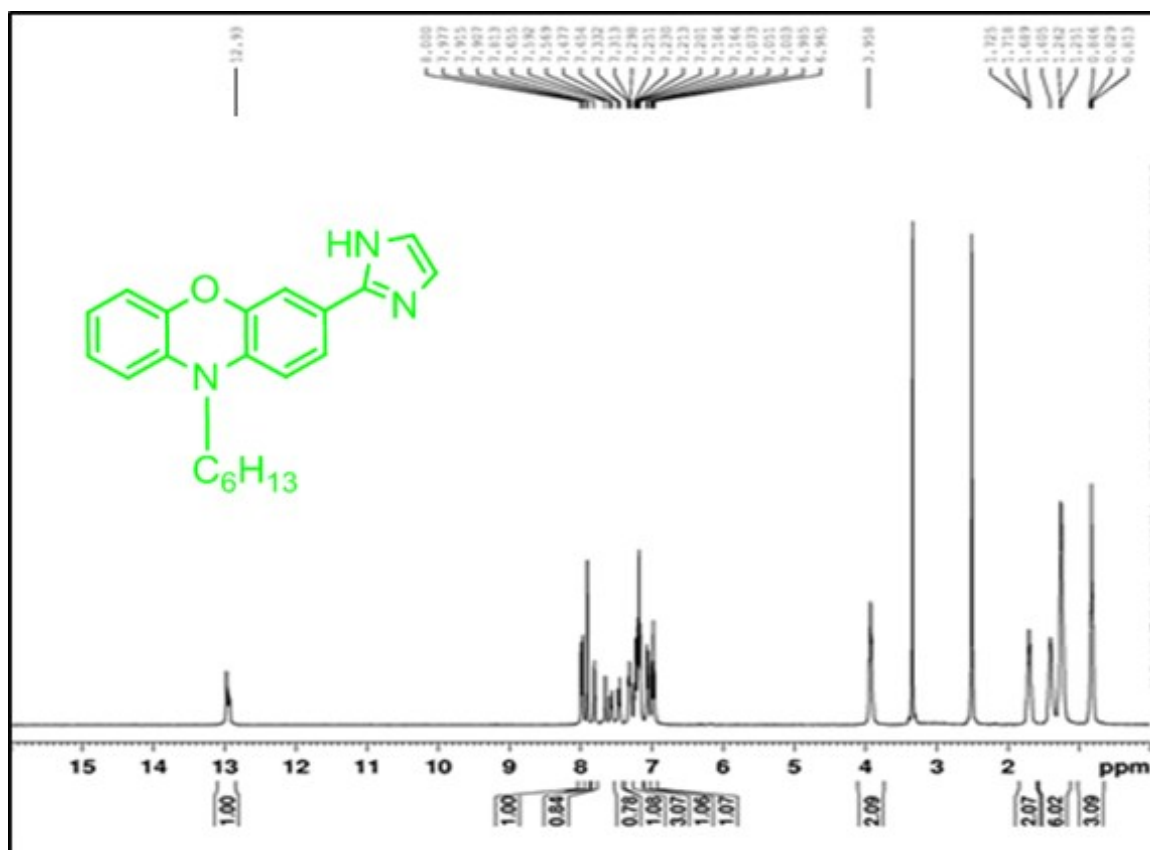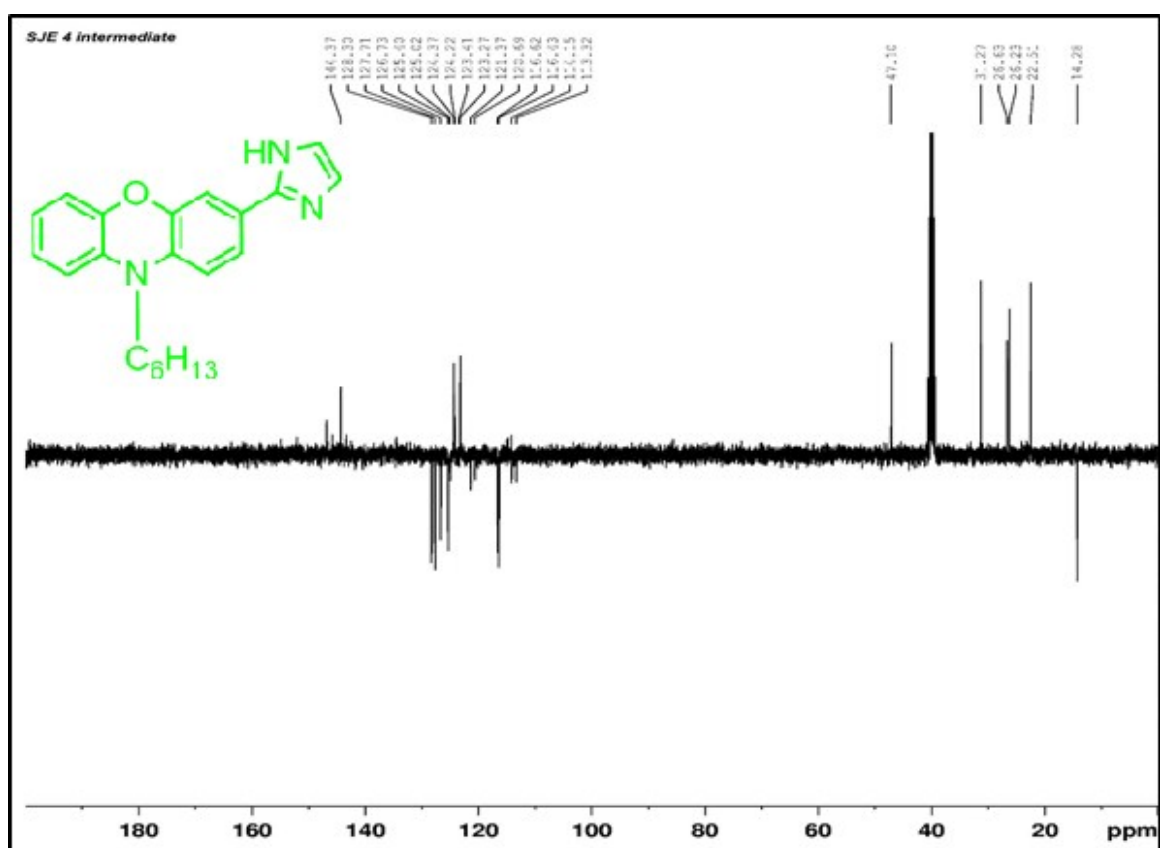

**Fig. S7.** <sup>1</sup>H-NMR and <sup>13</sup>C-NMR and MS spectra of SJE 4 intermediate

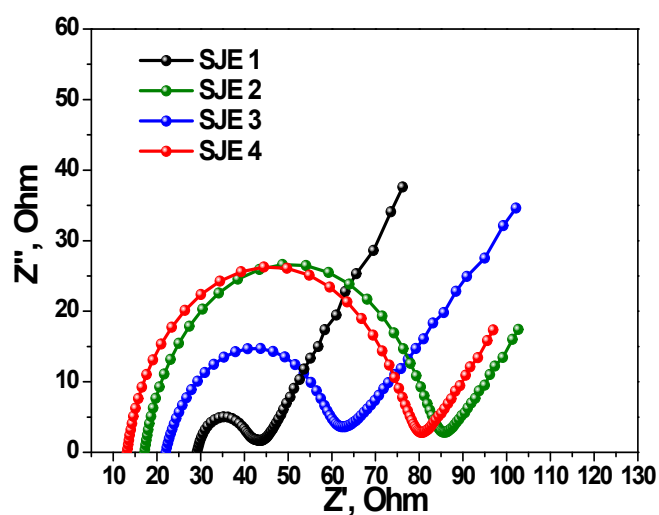

**Fig. S8.** EIS spectra of SJE 1- 4 between two platinum electrodes. The analysis were under frequency range 100MHz to 0.1Hz and an AC amplitude of 10mV. Conductivity was calculated from the  $R_b$  (Bulk resistance). The thickness of SOICs in between two symmetrical conducting plate,  $L = 60\mu\text{m}$  and area,  $A = 1.27\text{cm}^2$

| Electrolytes | $R_b$ ( $\Omega$ ) | Conductivity $\sigma$ (mS/cm) |
|--------------|--------------------|-------------------------------|
| SJE 1        | 29                 | 1.62                          |
| SJE 2        | 17                 | 2.94                          |
| SJE 3        | 22                 | 2.13                          |
| SJE 4        | 13                 | 3.61                          |

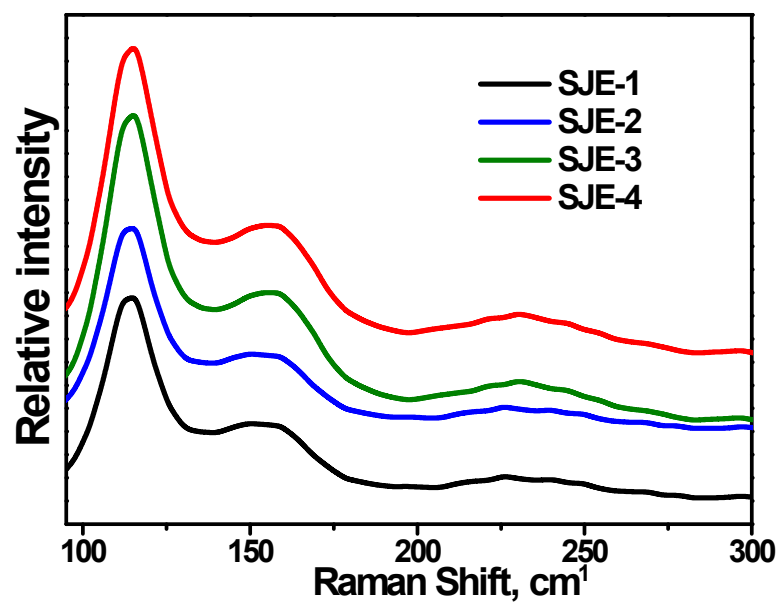

**Fig. S9.** Raman spectra of SJE 1- 4

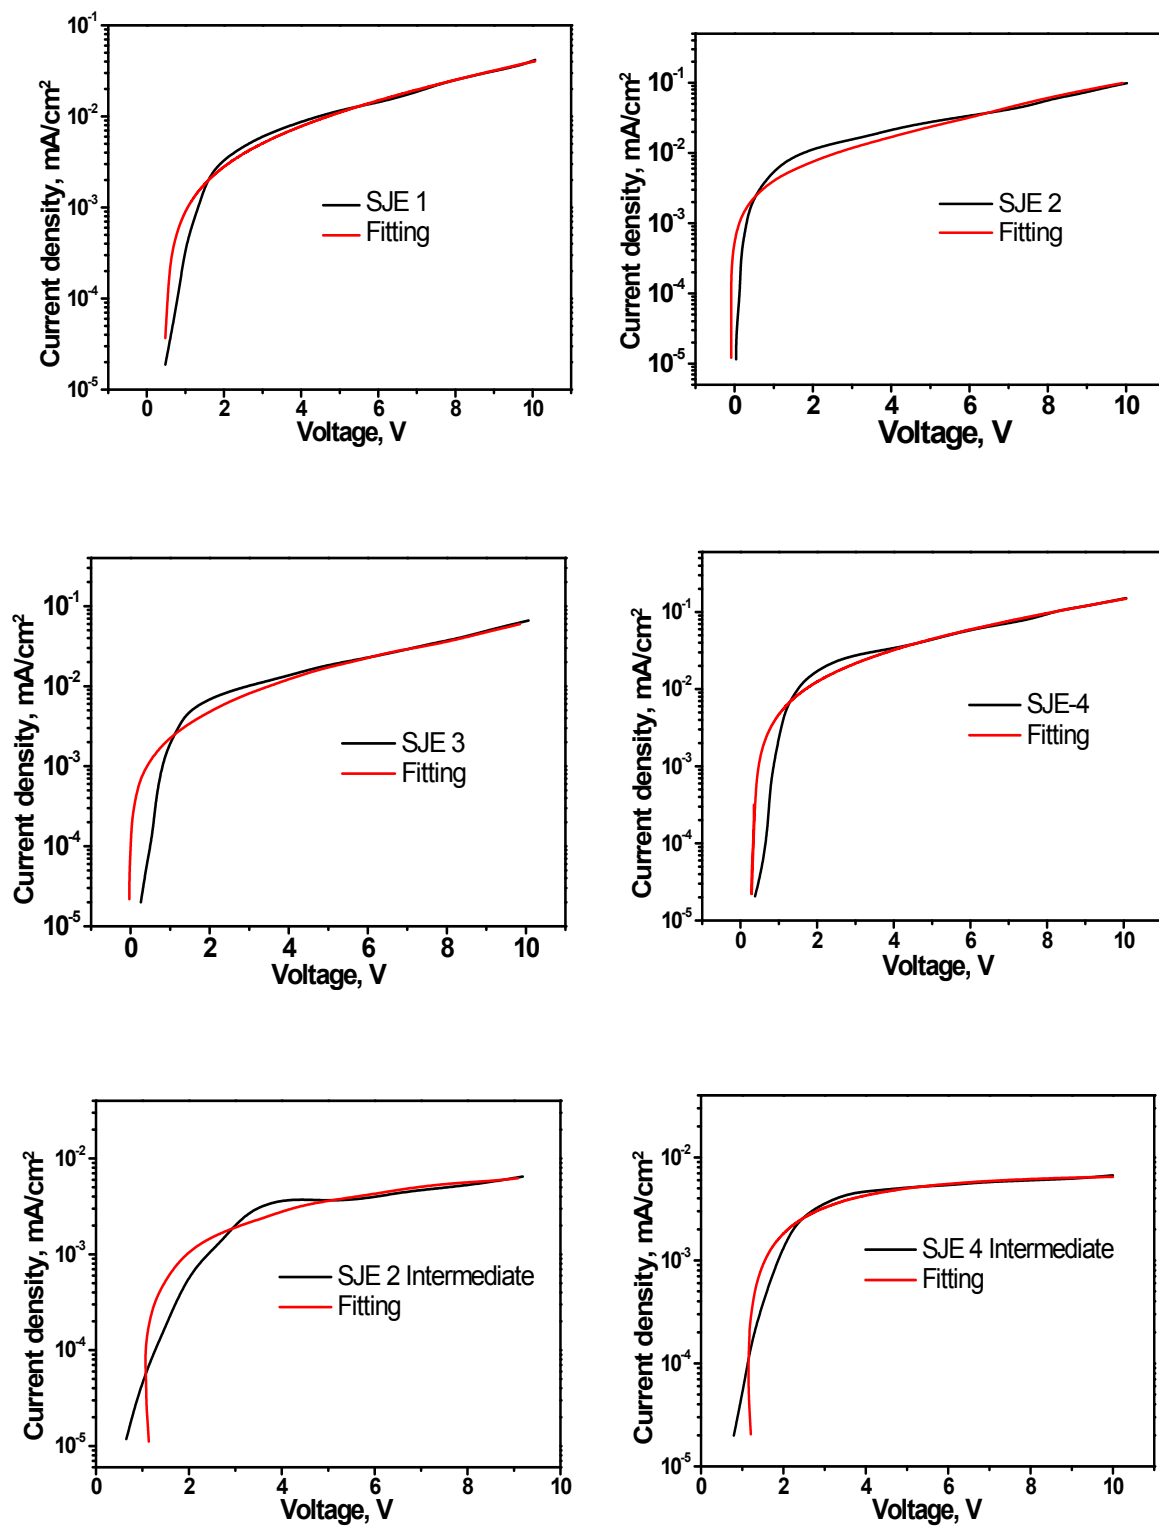

Fig. S10.  $J$ - $V$  curve of hole only devices fabricated for determination of hole mobility

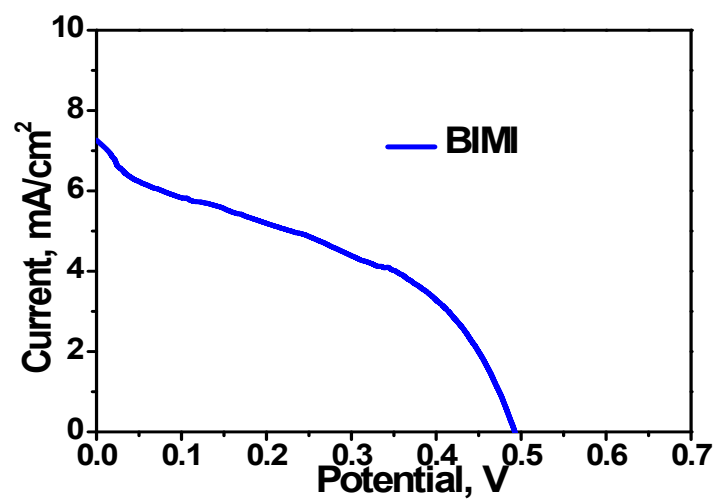

**Fig. S11.**  $J$ - $V$  curve of BIMl electrolyte based device under simulated solar light AM1.5, 100mW/cm<sup>2</sup>

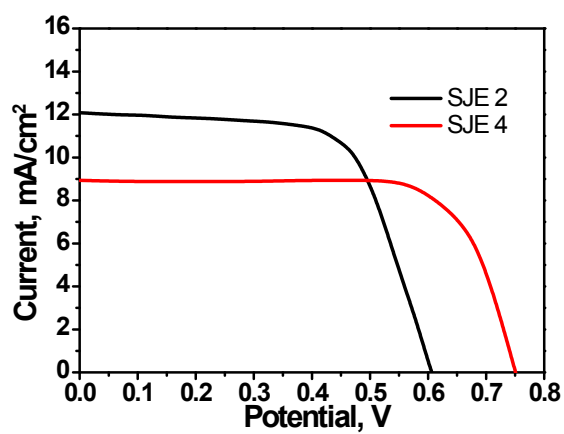

**Fig. S12.**  $J$ - $V$  curve for ss-DSSC with 60µm spacer for SJE 2 and SJE 4



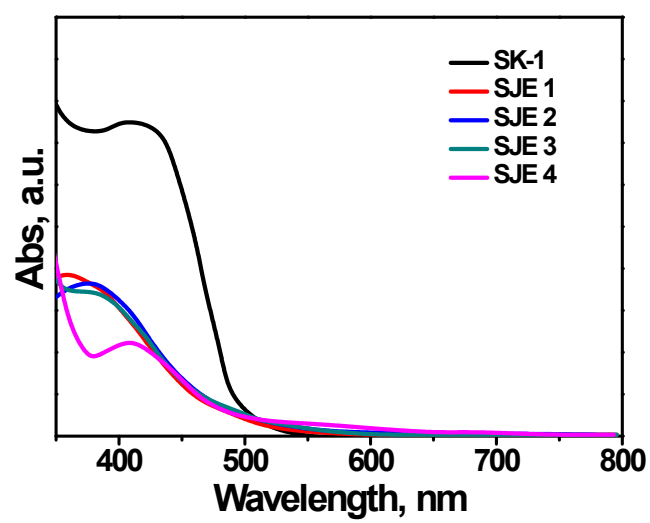

**Fig. S13.** UV-Vis spectra of pure SK 1 sensitizer and SJE 1-4

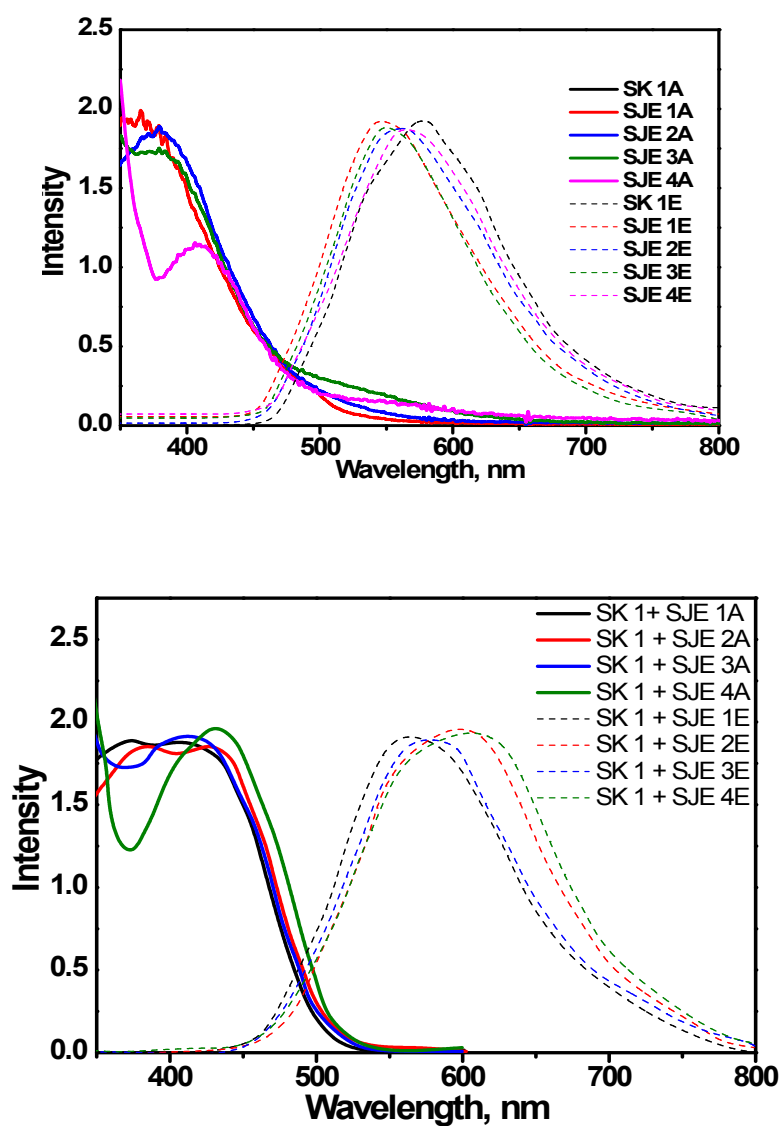

**Fig. S14.** UV-Vis and fluorescence spectra of SK 1 sensitizer and SJE 1-4

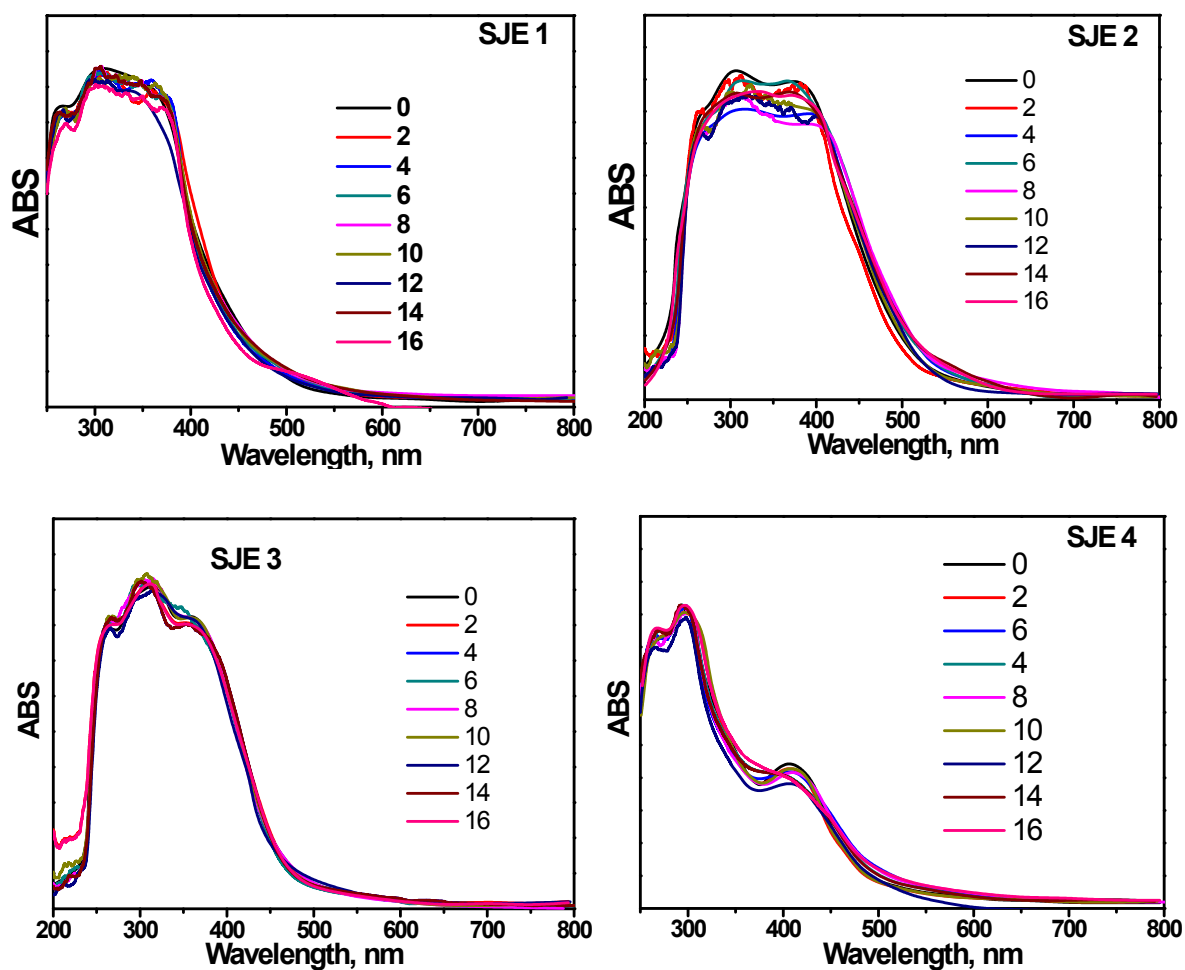

**Fig. S15.** Photostability study of SJE 1-4

We have carried out the UV-vis absorbance of all electrolytes in acetonitrile with different interval of sun light illumination from 0 to 16 days. There is no degradation observed in this compounds during this illumination. So, we can conclude that, these materials are highly stable and same is reflects in the device stability performance.

**Table S1.** HOMO-LUMO (DFT) calculation of SJE 2 and 4 intermediates

| Intermediate | HOMO                                                                                        | LUMO                                                                                          |
|--------------|---------------------------------------------------------------------------------------------|-----------------------------------------------------------------------------------------------|
| SJE 2        | 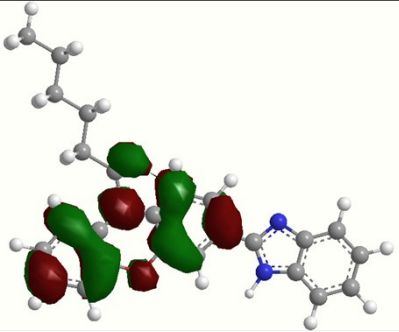<br>1.18V  | <br>-1.31V  |
| SJE 4        | <br>1.22V | <br>-1.28V |

SJE intermediate HOMO-LUMO level shows by computational method. Gaussian, DFT calculations were carried out for optimization using the B3LYP functional with 6-31G(d p) basis set.
